# Supplementary material for: Mendelian randomisation to uncover causal associations between conformation, metabolism, and production as potential exposure to reproduction in German Holstein dairy cattle
Source: Springer Nature journal article supplement (doi:10.1186/s12711-025-00950-w), 2025-02-25

**Figure S1, Conformation**  
MTY

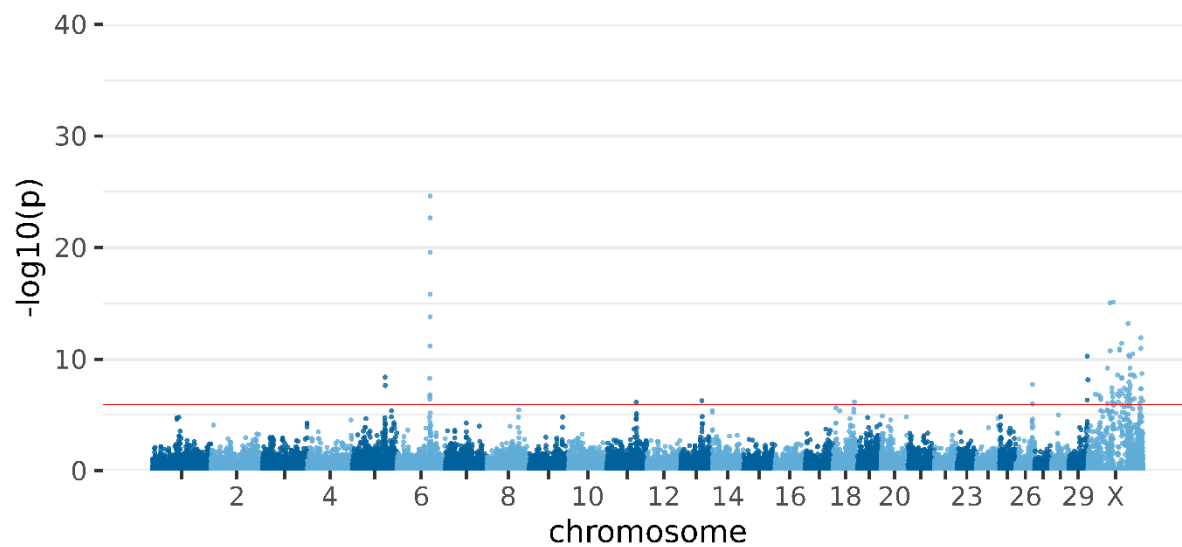

OCS

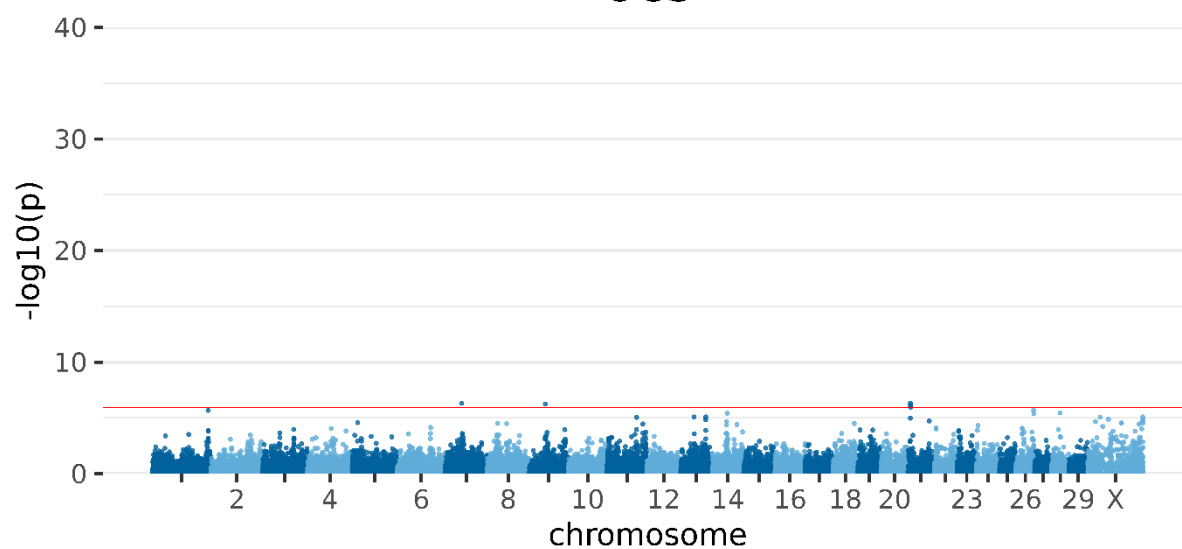

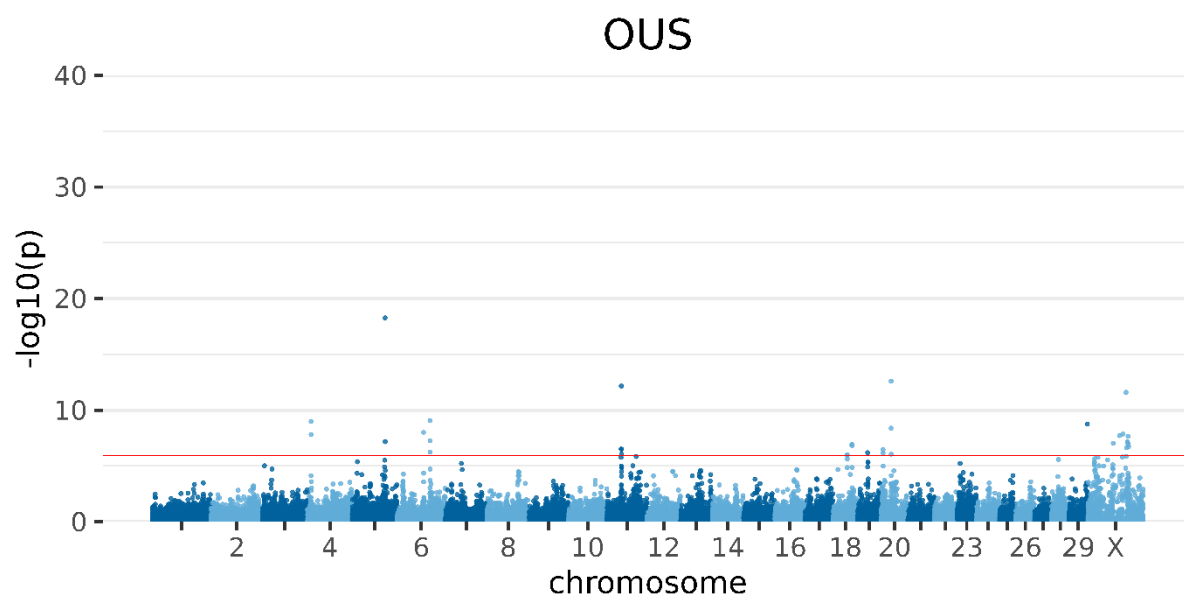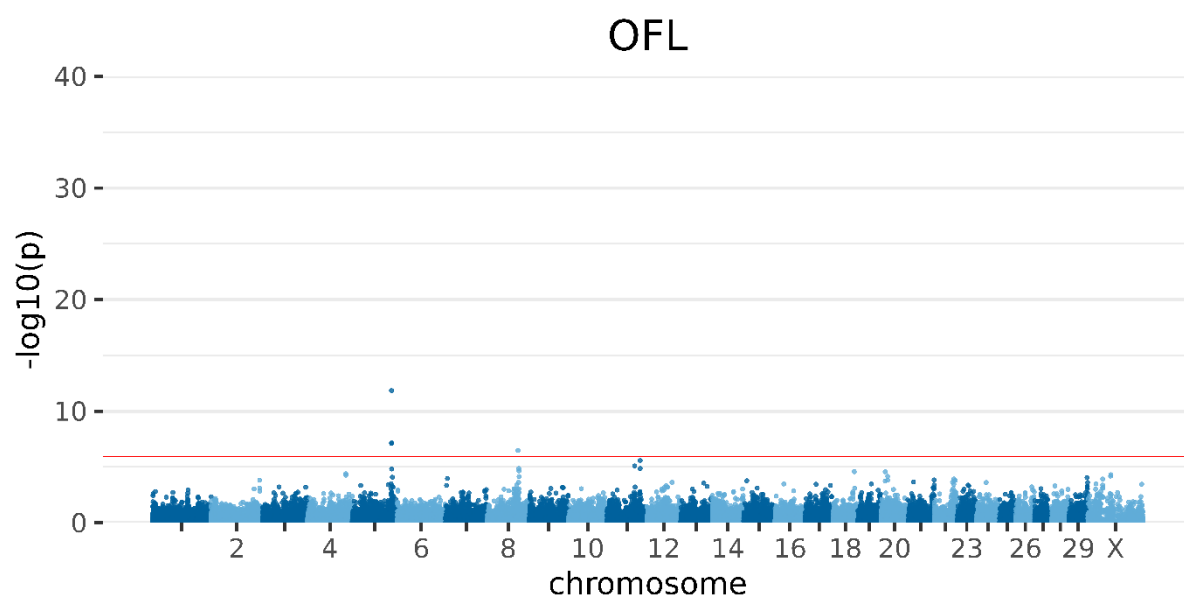

**Figure S2, Metabolism**  
LMV

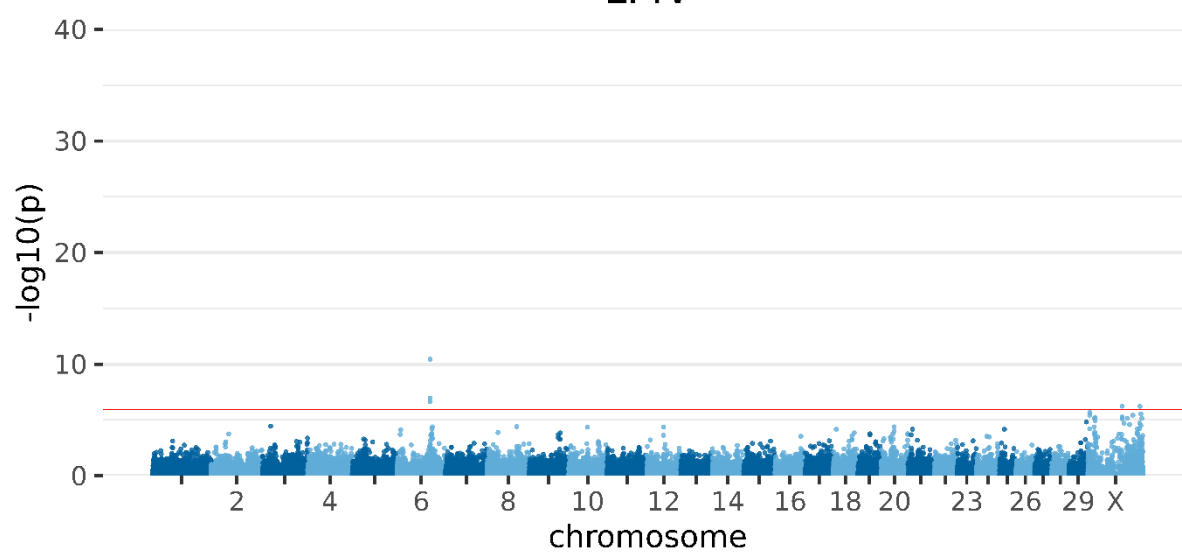

**Figure S3, Production**  
**FKG**

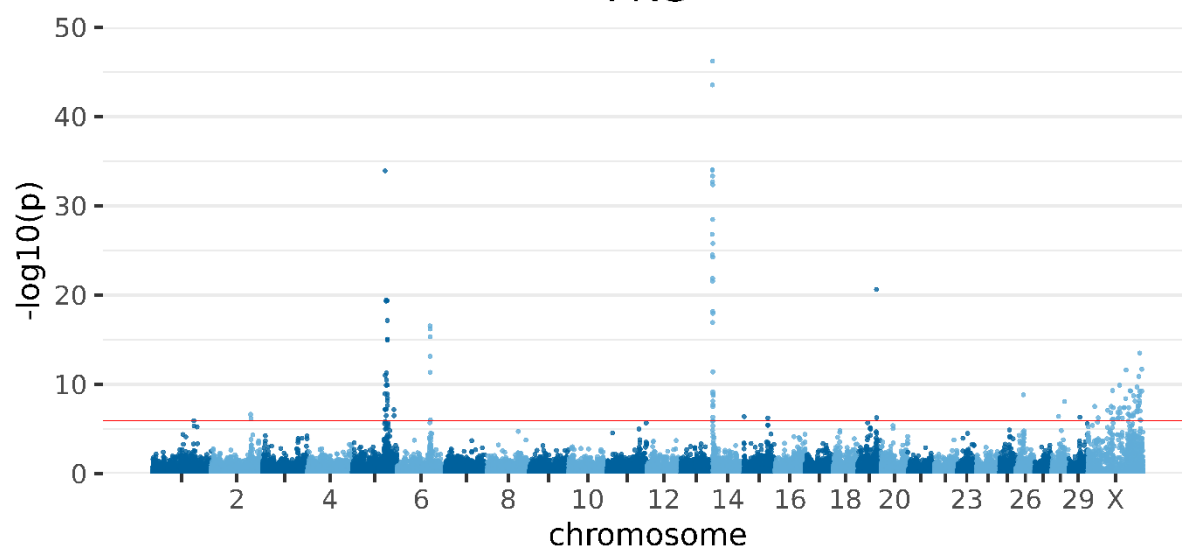

**MKG**

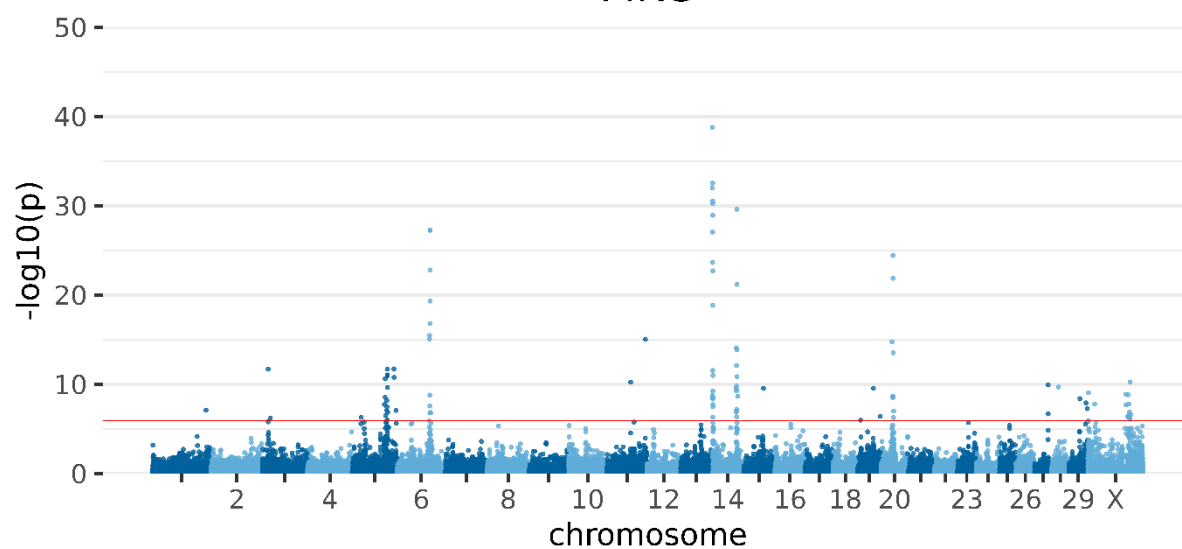

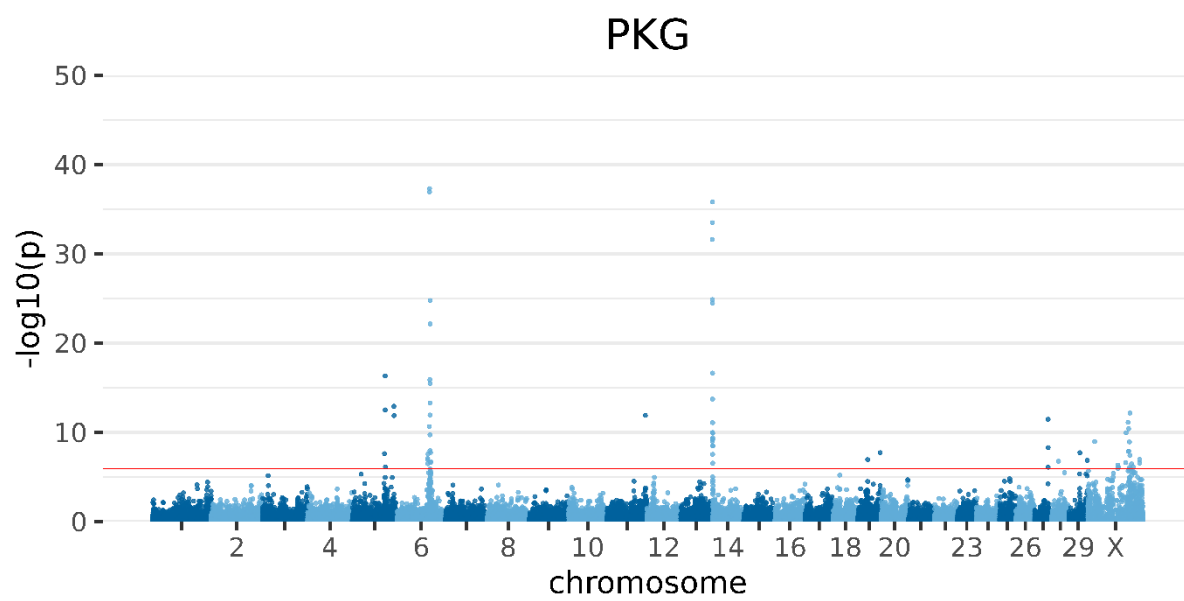

**Figure S4, Reproduction**  
CEd

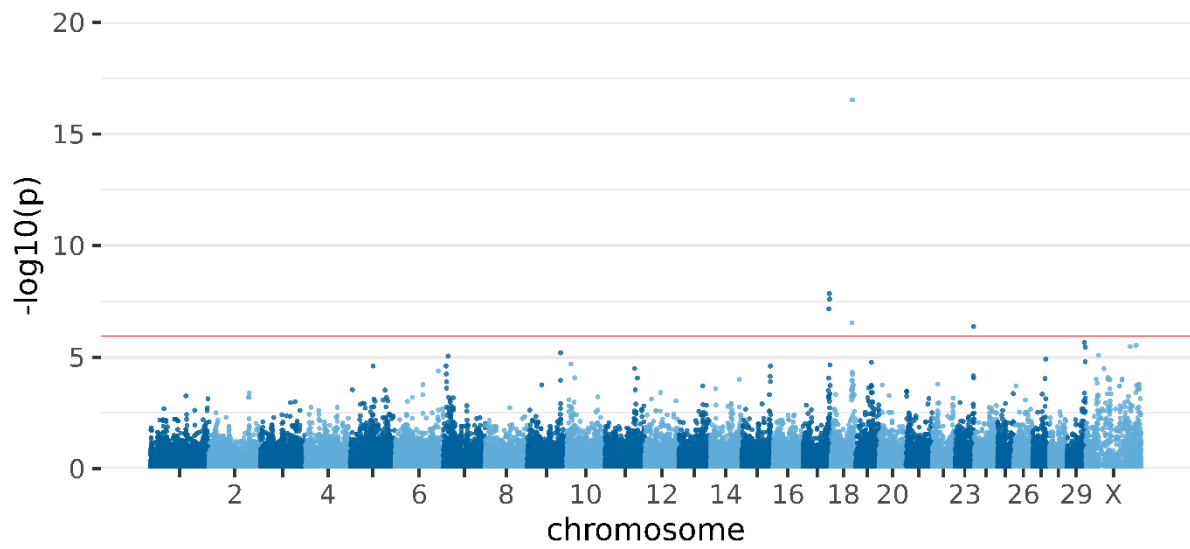

DOc

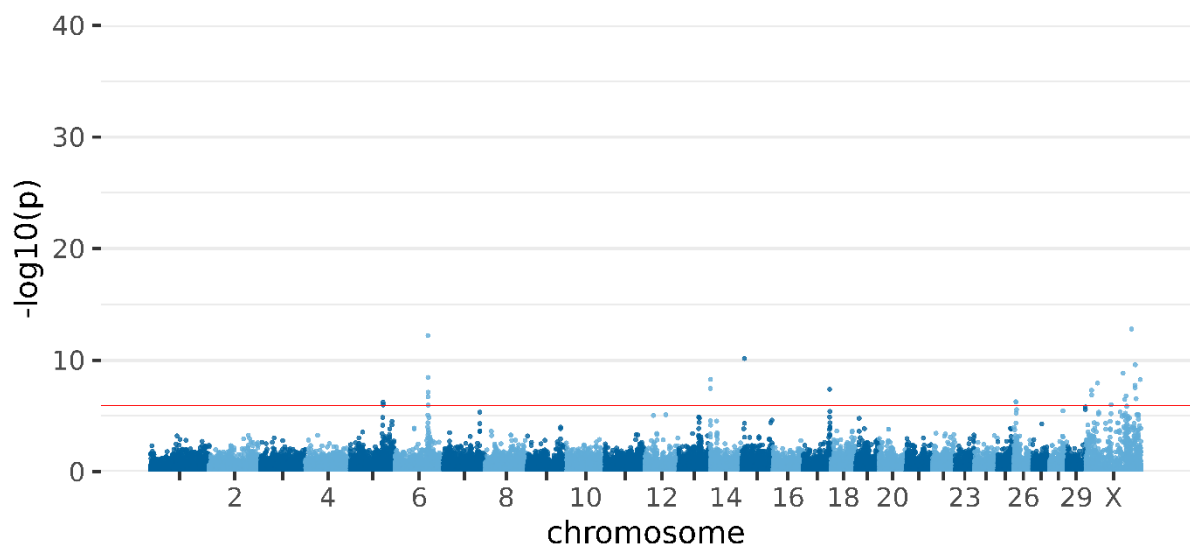

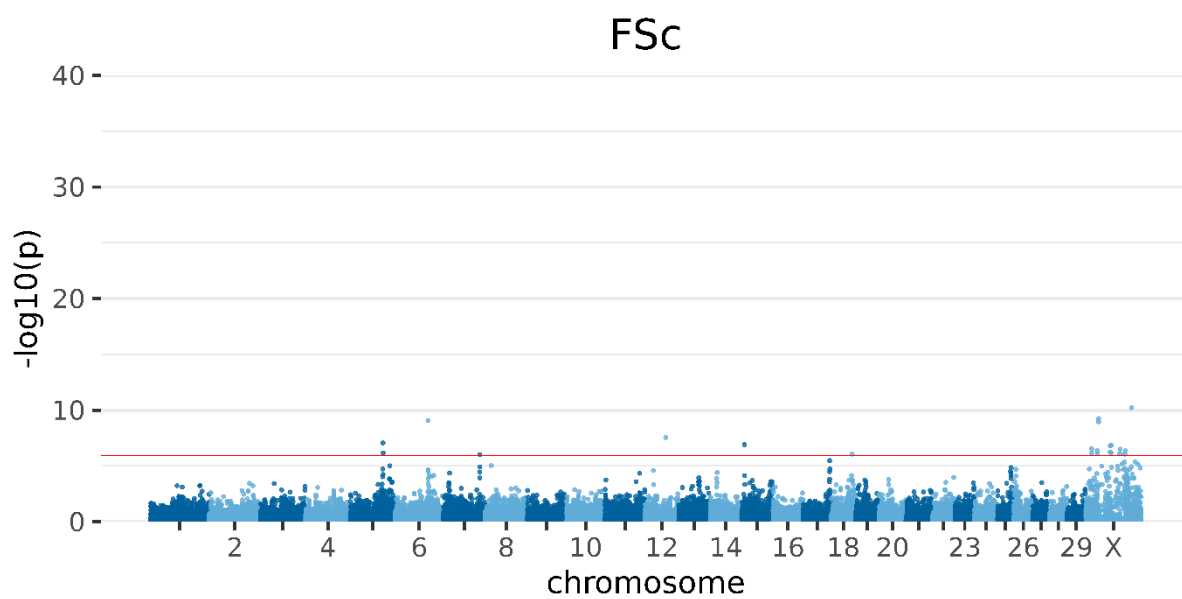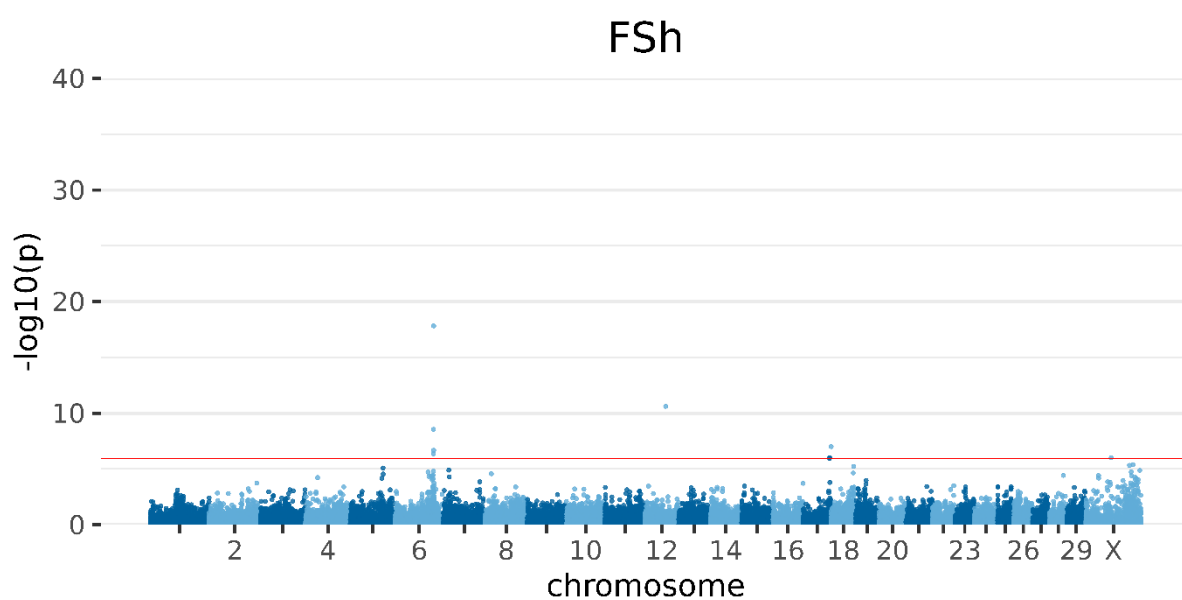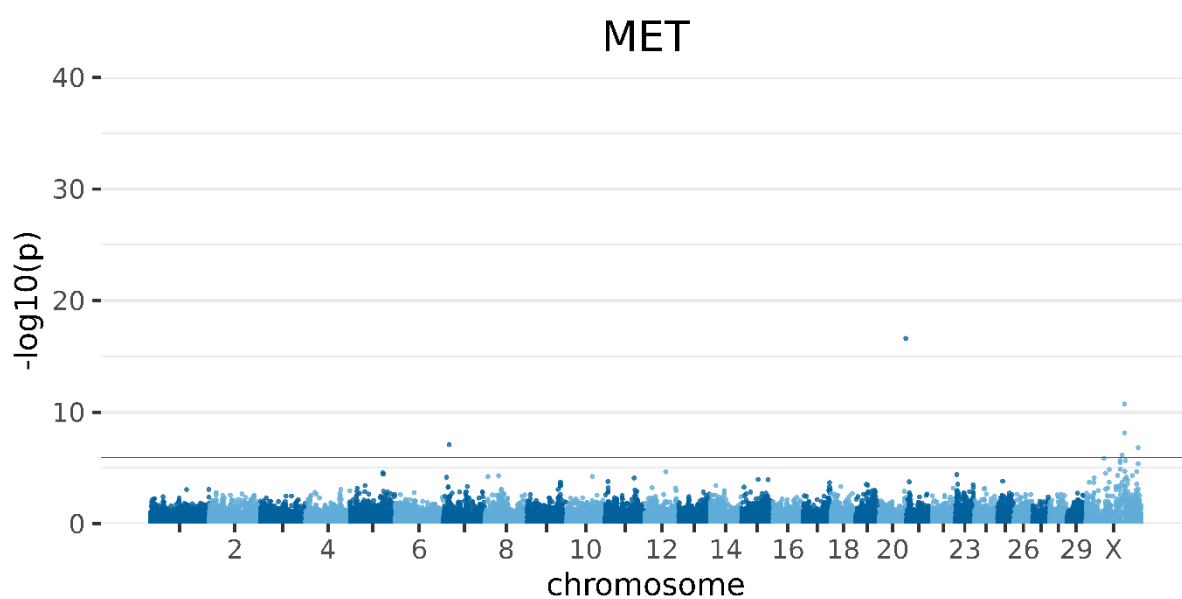

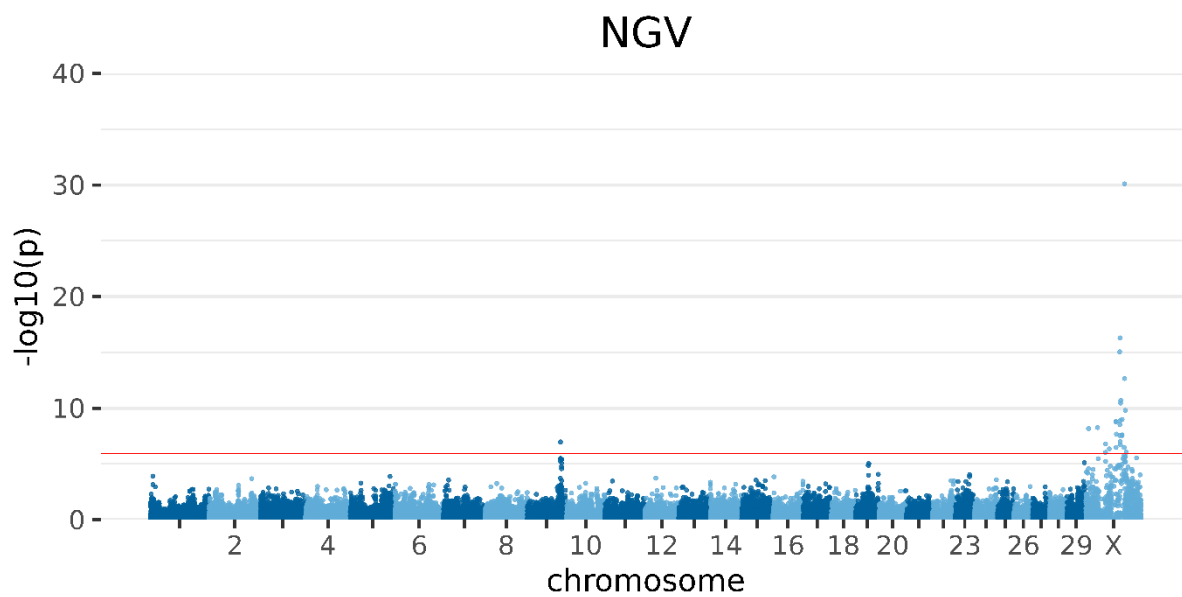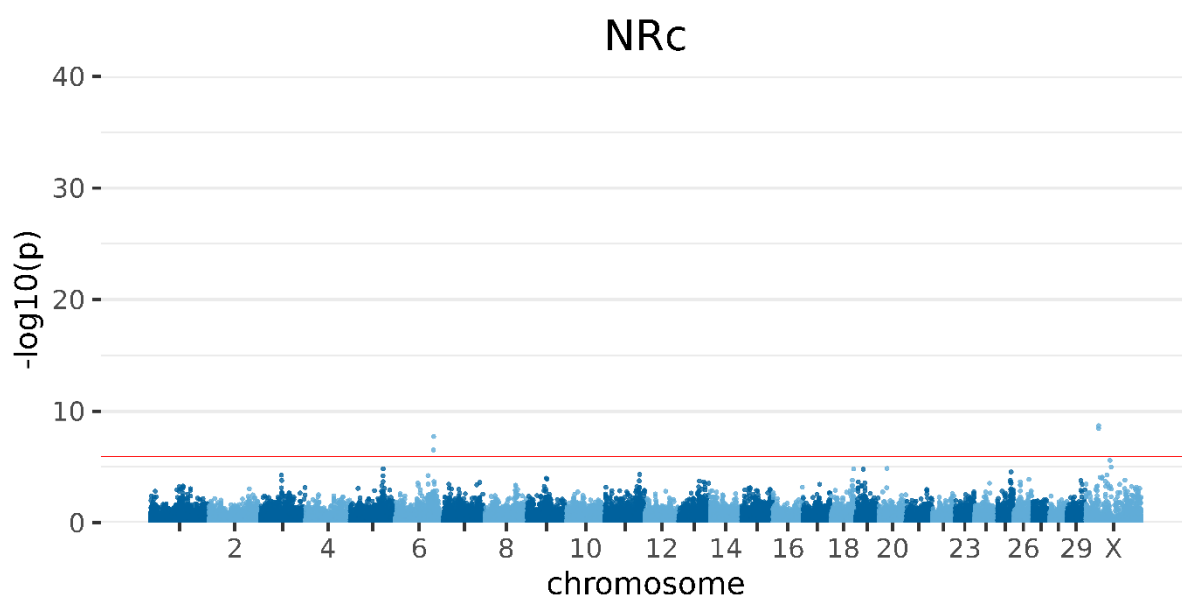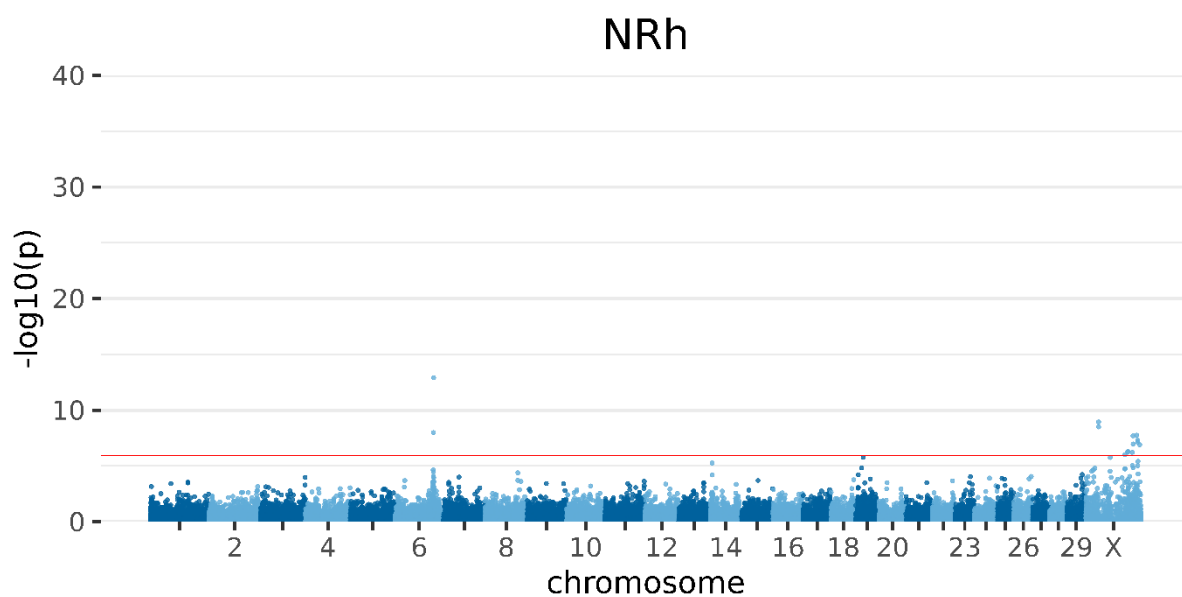



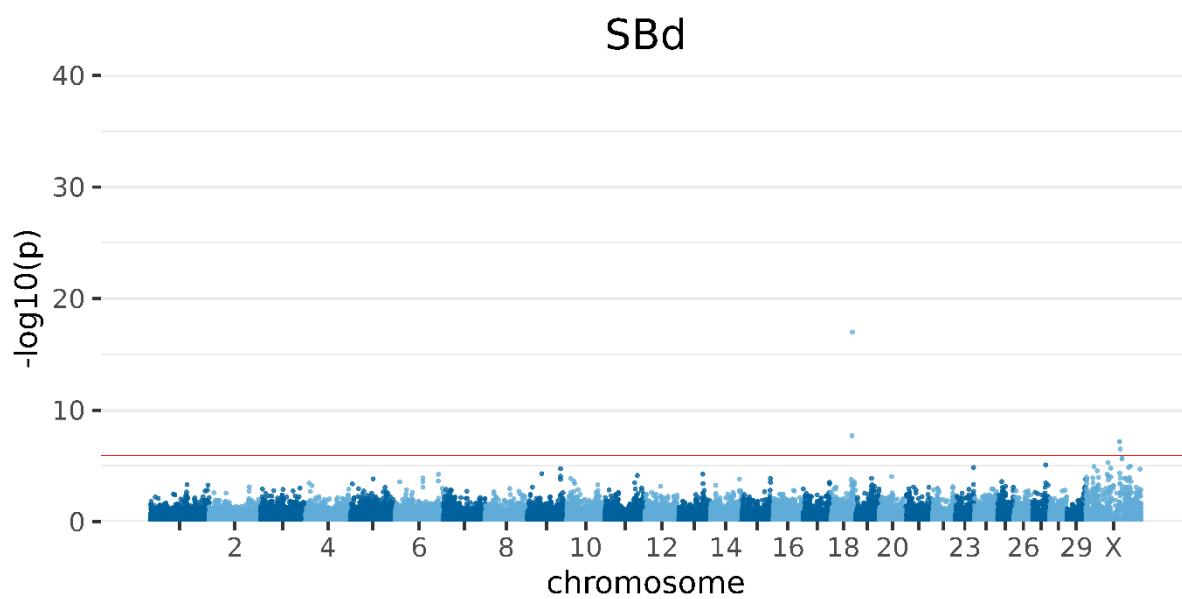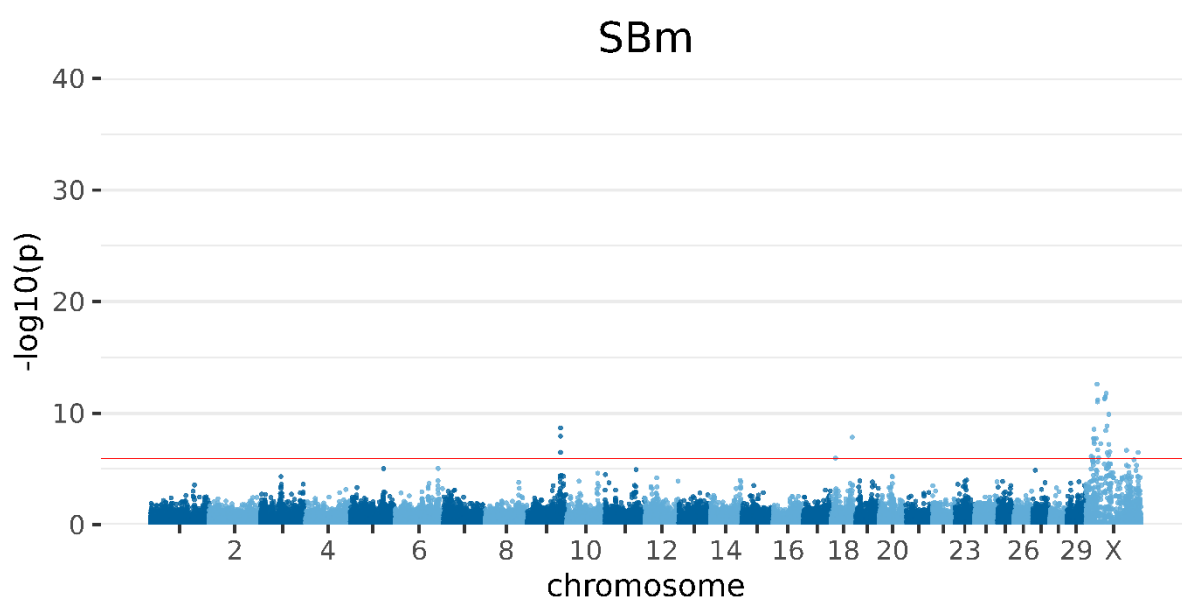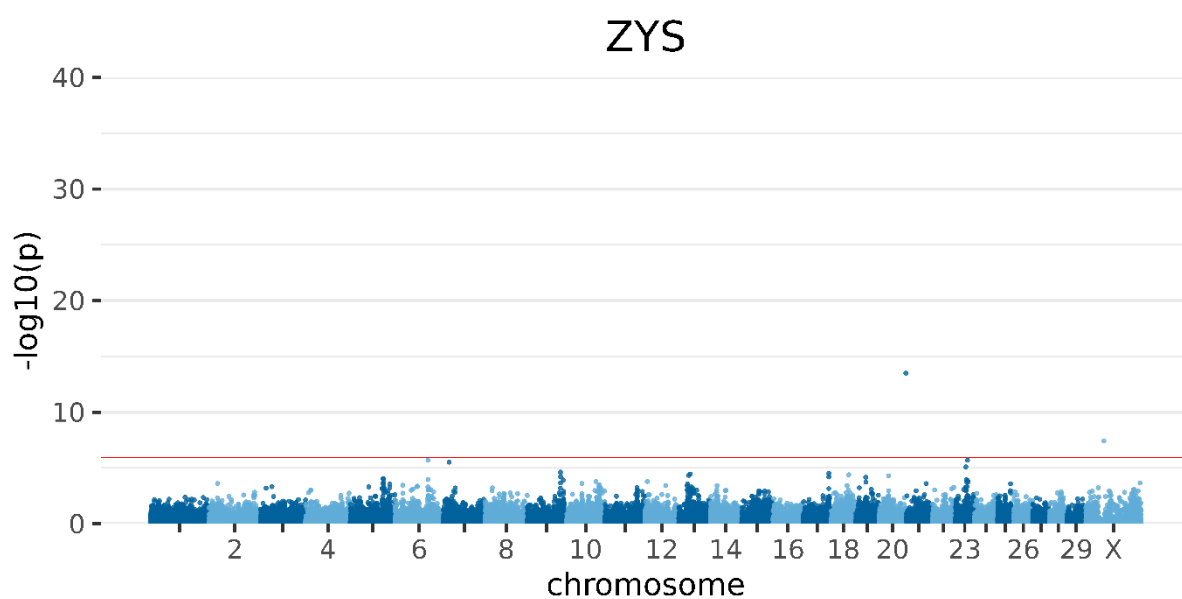

Supplement: MOESM3 [file 12711_2025_950_MOESM3_ESM.pdf]
